# Supplementary material for: An alcohol soluble amino-functionalized organoplatinum(ii) complex as the cathode interlayer for highly efficient polymer solar cells
Source: Royal Society of Chemistry journal article supplement (doi:10.1039/c5tc00452g), 2015-01-01
Supplement: c5tc00452g1.pdf [file c5tc00452g1.pdf]

**Supporting Information**  
**For**  
**Alcohol Soluble Amino-Functionalized Organoplatinum(II)**  
**Complex as a Cathode Interlayer for High Efficiency Polymer Solar**  
**Cells**

Shengjian Liu,<sup>‡</sup> Guichuan Zhang,<sup>‡</sup> Junming Lu, Jianchao Jia, Wei Li, Fei Huang,\* and Yong Cao

Institute of Polymer Optoelectronic Materials & Devices, State Key Laboratory of Luminescent Materials and Devices, South China University of Technology, Guangzhou 510640 (P. R. China).

[E-mail: msfhuang@scut.edu.cn.](mailto:msfhuang@scut.edu.cn)

**Content**

|                                                                |    |
|----------------------------------------------------------------|----|
| 1. Figure S1 ( <sup>1</sup> H NMR of the Pt-N)                 | S2 |
| 2. Figure S2 ( <sup>13</sup> C NMR of the Pt-N)                | S2 |
| 3. Figure S3 (MALDI-TOF MS of the Pt-N)                        | S3 |
| 4. Figure S4 (The powder X-ray diffraction curves of the Pt-N) | S3 |
| 5. Table S1 (Photovoltaic properties of the PSCs)              | S4 |
| 6. Table S2 ( $J_{sc}$ deduced from the EQE curves)            | S4 |
| 7. Electrochemical Cyclic Voltammetry (CV)                     | S5 |
| 8. Reference                                                   | S5 |

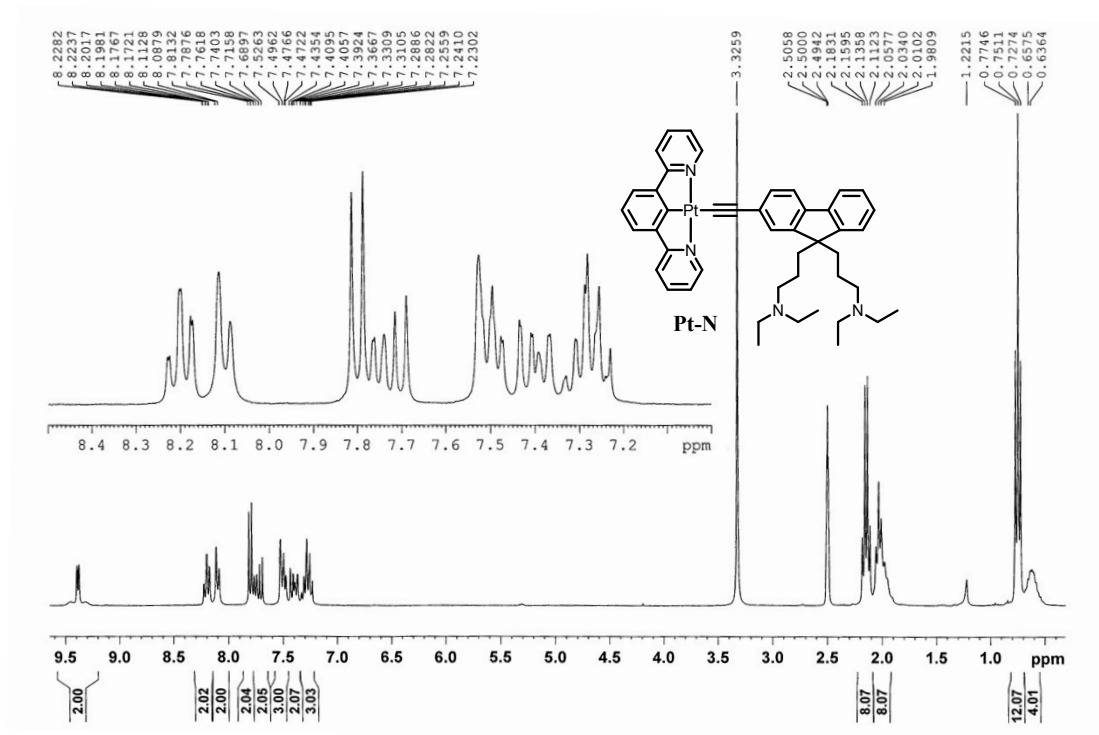

**Figure S1.** The <sup>1</sup>H NMR of the Pt-N.

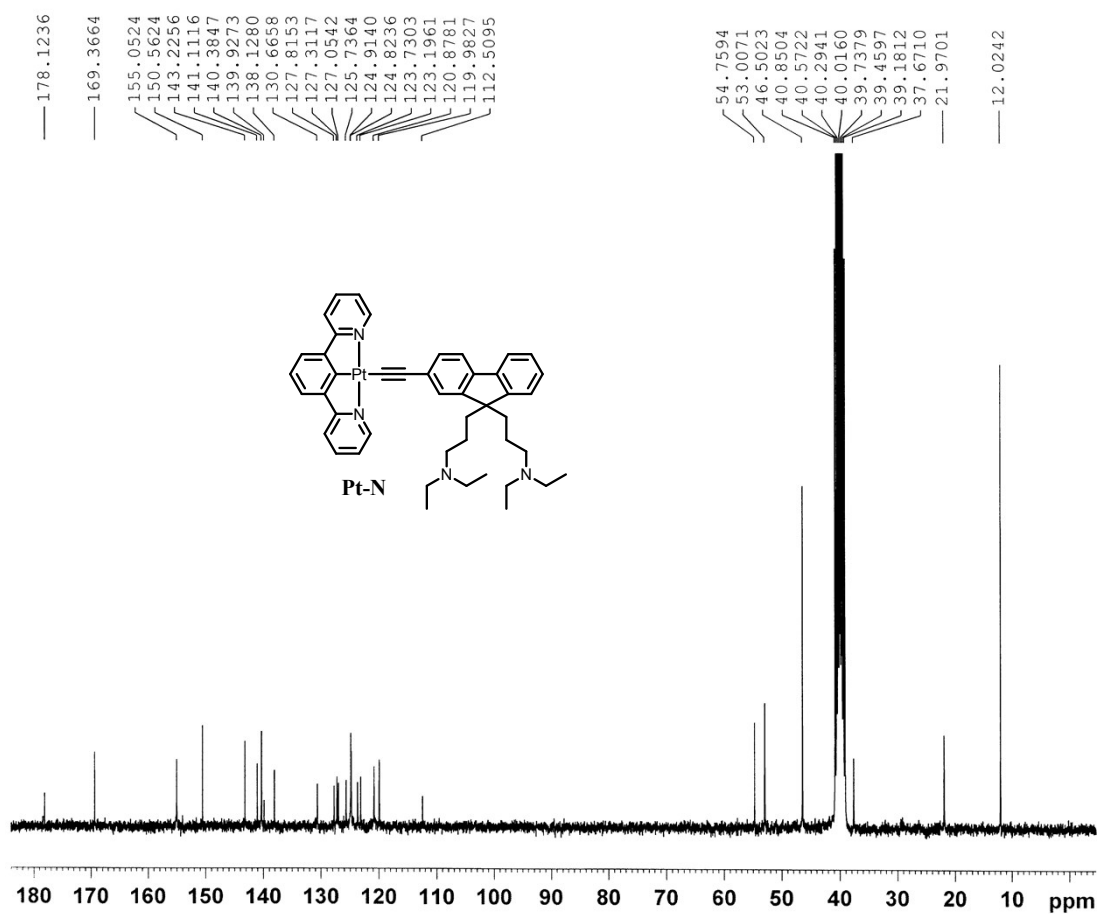

**Figure S2.** The <sup>13</sup>C NMR of the Pt-N

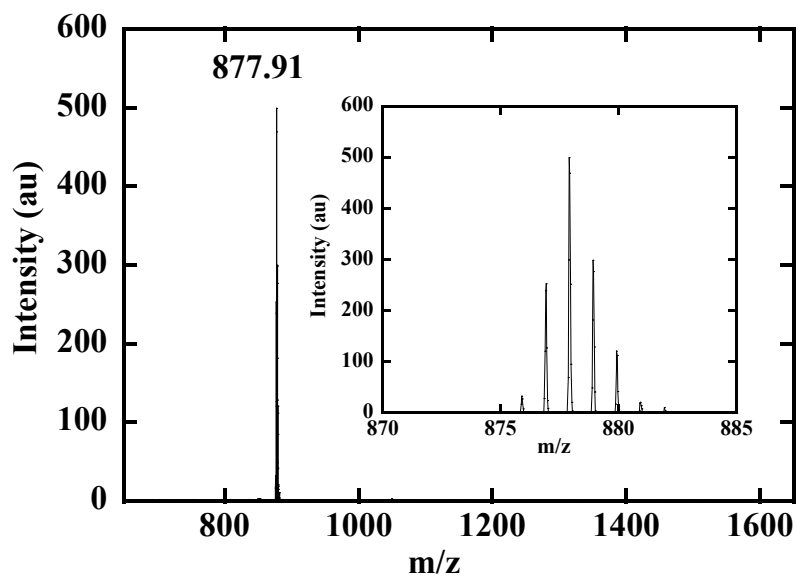

**Figure S3.** The MALDI-TOF MS of the Pt-N.

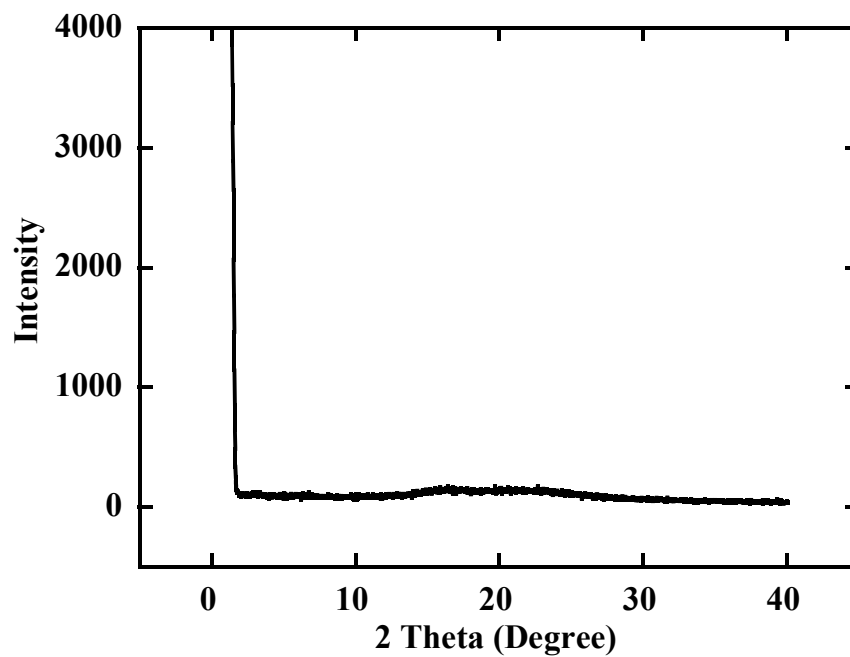

**Figure S4.** The powder X-ray diffraction curves of the Pt-N.

**Table S1.** Photovoltaic properties of the PSCs with various interlayers under AM 1.5G irradiation (100 mW cm<sup>-2</sup>). Device configuration: ITO/PEDOT:PSS/PTB7:PC<sub>71</sub>BM/interlayer/Al. The device performances data generated from 8 devices.

| Cathode               | PCE (%)   | $J_{sc}$ (mA cm <sup>-2</sup> ) | $V_{oc}$ (V) | FF (%)    |
|-----------------------|-----------|---------------------------------|--------------|-----------|
| PFN/Al                | 8.20±0.07 | 16.18±0.24                      | 0.74±0.01    | 68.46±1.1 |
| Pt-N/Al               | 8.89±0.09 | 16.36±0.26                      | 0.75±0.01    | 72.39±1.2 |
| CH <sub>3</sub> OH/Al | 5.54±0.06 | 16.30±0.25                      | 0.63±0.01    | 53.96±0.9 |
| Bare Al               | 3.62±0.04 | 15.65±0.20                      | 0.53±0.01    | 43.58±0.8 |

**Table S2.** The tested  $J_{sc}$  and calculated  $J_{sc}$  of the PSCs with various interlayers under AM 1.5G irradiation (100 mW cm<sup>-2</sup>).

| Cathode                                                   | Bare Al | CH <sub>3</sub> OH | PFN   | Pt-N  |
|-----------------------------------------------------------|---------|--------------------|-------|-------|
| Tested $J_{sc}$ (mA cm <sup>-2</sup> ) <sup>[a]</sup>     | 15.65   | 16.30              | 16.18 | 16.36 |
| Calculated $J_{sc}$ (mA cm <sup>-2</sup> ) <sup>[b]</sup> | 15.05   | 15.52              | 15.56 | 15.44 |

[a]  $J_{sc}$  deduced from the  $J$ - $V$  curves (see **Figure 3a**), [b]  $J_{sc}$  deduced from the EQE curves (see **Figure 4**).

### Electrochemical Cyclic Voltammetry (CV)

Electrochemical cyclic voltammetry measurements were carried out using a CHI800 electro-chemical workstation equipped with an indium tin oxide (ITO) working electrode, a saturated calomel electrode as the reference electrode, and a Pt sheet counter electrode. The measurements were done in anhydrous acetonitrile with tetrabutylammonium hexafluorophosphate (0.1 M) as the supporting electrolyte under an argon atmosphere at a scan rate of 50 mV/s. The potential of the saturated calomel reference electrode was internally calibrated using the ferrocene/ferrocenium redox couple (Fc/Fc<sup>+</sup>), which has a known reduction potential of -4.8 eV.<sup>[1]</sup> The HOMO and LUMO energy levels were calculated by the following equations:  $E_{HOMO} = -(E_{ox} + 4.80)$  eV,  $E_{LUMO} = (E_{HOMO} + E_g)$  eV.<sup>[1]</sup>

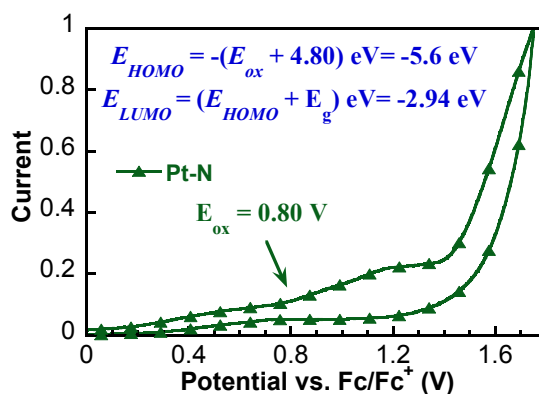

Figure S5: CV curves of the Pt-N measured in 0.1 M Bu<sub>4</sub>NPF<sub>6</sub> versus Fc/Fc<sup>+</sup> in acetonitrile.

Reference:

1. Y. F. Li, Y. Cao, J. Gao, D. L. Wang, G. Yu, A. J. Heeger. *Synth. Met.*, 1999, **99**, 243.
